# Supplementary material for: CDKL3 promotes osteosarcoma progression by activating Akt/PKB
Source: Life Sci Alliance. 2020 Mar 31;3(5):e202000648. doi: 10.26508/lsa.202000648 (PMC7119369; doi:10.26508/lsa.202000648)
Supplement: Supplementary file 6 [file LSA-2020-00648_TableS3_2.xlsx]

## Sheet: GSE21257cdkl3_0.3up
Table S3_upregulated pathways
ID	Description	GeneRatio	pvalue	p.adjust
hsa05016	Huntington disease	18/216	-2.93336	0.00116584
hsa05012	Parkinson disease	14/216	-2.43251	0.00369396
hsa05010	Alzheimer disease	14/216	-1.79502	0.0160315
hsa00190	Oxidative phosphorylation	12/216	-1.79502	0.0160315
hsa04932	Non-alcoholic fatty liver disease (NAFLD)	12/216	-1.44119	0.0362083
hsa04110	Cell cycle	8/216	-0.135659	0.731714
hsa05416	Viral myocarditis	5/216	-0.135659	0.731714
hsa03060	Protein export	3/216	-0.135659	0.731714
hsa04260	Cardiac muscle contraction	6/216	-0.0915783	0.809882
hsa00790	Folate biosynthesis	3/216	-0.0915783	0.809882
hsa01524	Platinum drug resistance	5/216	-0.00438531	0.989953
hsa04714	Thermogenesis	11/216	-0.00438531	0.989953
hsa04114	Oocyte meiosis	7/216	-0.00438531	0.989953
hsa00120	Primary bile acid biosynthesis	2/216	-0.00438531	0.989953
hsa04020	Calcium signaling pathway	9/216	-0.00438531	0.989953
hsa00620	Pyruvate metabolism	3/216	-0.00438531	0.989953
hsa00260	Glycine, serine and threonine metabolism	3/216	-0.00438531	0.989953
hsa01200	Carbon metabolism	6/216	-0.00438531	0.989953
hsa00860	Porphyrin and chlorophyll metabolism	3/216	-0.00438531	0.989953
hsa04350	TGF-beta signaling pathway	5/216	-0.00438531	0.989953
hsa00010	Glycolysis / Gluconeogenesis	4/216	-0.00438531	0.989953
hsa02010	ABC transporters	3/216	-0.00438531	0.989953
hsa03010	Ribosome	7/216	-0.00438531	0.989953
hsa03430	Mismatch repair	2/216	-0.00438531	0.989953
hsa04115	p53 signaling pathway	4/216	-0.00438531	0.989953
hsa04914	Progesterone-mediated oocyte maturation	5/216	-0.00438531	0.989953
hsa00565	Ether lipid metabolism	3/216	-0.00438531	0.989953
hsa00062	Fatty acid elongation	2/216	-0.00438531	0.989953
hsa01040	Biosynthesis of unsaturated fatty acids	2/216	-0.00438531	0.989953
hsa03018	RNA degradation	4/216	-0.00438531	0.989953
hsa04146	Peroxisome	4/216	-0.00438531	0.989953
hsa00020	Citrate cycle (TCA cycle)	2/216	-0.00438531	0.989953
hsa01212	Fatty acid metabolism	3/216	-0.00438531	0.989953
hsa05134	Legionellosis	3/216	-0.00438531	0.989953
hsa00052	Galactose metabolism	2/216	-0.00438531	0.989953
hsa00512	Mucin type O-glycan biosynthesis	2/216	-0.00438531	0.989953
hsa03020	RNA polymerase	2/216	-0.00438531	0.989953
hsa04723	Retrograde endocannabinoid signaling	6/216	-0.00438531	0.989953
hsa04215	Apoptosis - multiple species	2/216	-0.00438531	0.989953
hsa04727	GABAergic synapse	4/216	-0.00438531	0.989953
hsa00051	Fructose and mannose metabolism	2/216	-0.00438531	0.989953
hsa00561	Glycerolipid metabolism	3/216	-0.00438531	0.989953
hsa00040	Pentose and glucuronate interconversions	2/216	-0.00438531	0.989953
hsa04130	SNARE interactions in vesicular transport	2/216	-0.00438531	0.989953
hsa04144	Endocytosis	9/216	-0.00438531	0.989953
hsa00920	Sulfur metabolism	1/216	-0.00438531	0.989953
hsa00130	Ubiquinone and other terpenoid-quinone biosynthesis	1/216	-0.00438531	0.989953
hsa05223	Non-small cell lung cancer	3/216	-0.00438531	0.989953
hsa04218	Cellular senescence	6/216	-0.00438531	0.989953
hsa00830	Retinol metabolism	3/216	-0.00438531	0.989953
hsa01522	Endocrine resistance	4/216	-0.00438531	0.989953
hsa04217	Necroptosis	6/216	-0.00438531	0.989953
hsa04061	Viral protein interaction with cytokine and cytokine receptor	4/216	-0.00438531	0.989953
hsa04975	Fat digestion and absorption	2/216	-0.00438531	0.989953
hsa05218	Melanoma	3/216	-0.00438531	0.989953
hsa05100	Bacterial invasion of epithelial cells	3/216	-0.00438531	0.989953
hsa04612	Antigen processing and presentation	3/216	-0.00438531	0.989953
hsa04930	Type II diabetes mellitus	2/216	-0.00438531	0.989953
hsa05168	Herpes simplex virus 1 infection	15/216	-0.00438531	0.989953
hsa00280	Valine, leucine and isoleucine degradation	2/216	-0.00438531	0.989953
hsa00511	Other glycan degradation	1/216	-0.00438531	0.989953
hsa00330	Arginine and proline metabolism	2/216	-0.00438531	0.989953
hsa04979	Cholesterol metabolism	2/216	-0.00438531	0.989953
hsa05110	Vibrio cholerae infection	2/216	-0.00438531	0.989953
hsa04150	mTOR signaling pathway	5/216	-0.00438531	0.989953
hsa04919	Thyroid hormone signaling pathway	4/216	-0.00438531	0.989953
hsa00100	Steroid biosynthesis	1/216	-0.00438531	0.989953
hsa00531	Glycosaminoglycan degradation	1/216	-0.00438531	0.989953
hsa04610	Complement and coagulation cascades	3/216	-0.00438531	0.989953
hsa04934	Cushing syndrome	5/216	-0.00438531	0.989953
hsa04540	Gap junction	3/216	-0.00438531	0.989953
hsa04142	Lysosome	4/216	-0.00438531	0.989953
hsa00480	Glutathione metabolism	2/216	-0.00438531	0.989953
hsa00900	Terpenoid backbone biosynthesis	1/216	-0.00438531	0.989953
hsa05222	Small cell lung cancer	3/216	-0.00438531	0.989953
hsa05203	Viral carcinogenesis	6/216	-0.00438531	0.989953
hsa03013	RNA transport	5/216	-0.00438531	0.989953
hsa00340	Histidine metabolism	1/216	-0.00438531	0.989953
hsa04964	Proximal tubule bicarbonate reclamation	1/216	-0.00438531	0.989953
hsa04974	Protein digestion and absorption	3/216	-0.00438531	0.989953
hsa05225	Hepatocellular carcinoma	5/216	-0.00438531	0.989953
hsa00564	Glycerophospholipid metabolism	3/216	-0.00438531	0.989953
hsa05215	Prostate cancer	3/216	-0.00438531	0.989953
hsa00310	Lysine degradation	2/216	-0.00438531	0.989953
hsa00563	Glycosylphosphatidylinositol (GPI)-anchor biosynthesis	1/216	-0.00438531	0.989953
hsa00592	alpha-Linolenic acid metabolism	1/216	-0.00438531	0.989953
hsa03040	Spliceosome	4/216	-0.00438531	0.989953
hsa04120	Ubiquitin mediated proteolysis	4/216	-0.00438531	0.989953
hsa04950	Maturity onset diabetes of the young	1/216	-0.00438531	0.989953
hsa04140	Autophagy - animal	4/216	-0.00438531	0.989953
hsa05170	Human immunodeficiency virus 1 infection	6/216	-0.00438531	0.989953
hsa00053	Ascorbate and aldarate metabolism	1/216	-0.00438531	0.989953
hsa04966	Collecting duct acid secretion	1/216	-0.00438531	0.989953
hsa05418	Fluid shear stress and atherosclerosis	4/216	-0.00438531	0.989953
hsa04137	Mitophagy - animal	2/216	-0.00438531	0.989953
hsa04927	Cortisol synthesis and secretion	2/216	-0.00438531	0.989953
hsa04744	Phototransduction	1/216	-0.00438531	0.989953
hsa00970	Aminoacyl-tRNA biosynthesis	2/216	-0.00438531	0.989953
hsa04621	NOD-like receptor signaling pathway	5/216	-0.00438531	0.989953
hsa00591	Linoleic acid metabolism	1/216	-0.00438531	0.989953
hsa05166	Human T-cell leukemia virus 1 infection	6/216	-0.00438531	0.989953
hsa04922	Glucagon signaling pathway	3/216	-0.00438531	0.989953
hsa00030	Pentose phosphate pathway	1/216	-0.00438531	0.989953
hsa05211	Renal cell carcinoma	2/216	-0.00438531	0.989953
hsa05230	Central carbon metabolism in cancer	2/216	-0.00438531	0.989953
hsa05034	Alcoholism	5/216	-0.00438531	0.989953
hsa04514	Cell adhesion molecules (CAMs)	4/216	-0.00438531	0.989953
hsa05224	Breast cancer	4/216	-0.00438531	0.989953
hsa05120	Epithelial cell signaling in Helicobacter pylori infection	2/216	-0.00438531	0.989953
hsa05202	Transcriptional misregulation in cancer	5/216	-0.00438531	0.989953
hsa00410	beta-Alanine metabolism	1/216	-0.00438531	0.989953
hsa01523	Antifolate resistance	1/216	-0.00438531	0.989953
hsa04710	Circadian rhythm	1/216	-0.00438531	0.989953
hsa05226	Gastric cancer	4/216	-0.00438531	0.989953
hsa04136	Autophagy - other	1/216	-0.00438531	0.989953
hsa00982	Drug metabolism - cytochrome P450	2/216	-0.00438531	0.989953
hsa04976	Bile secretion	2/216	-0.00438531	0.989953
hsa05145	Toxoplasmosis	3/216	-0.00438531	0.989953
hsa04145	Phagosome	4/216	-0.00438531	0.989953
hsa00562	Inositol phosphate metabolism	2/216	-0.00438531	0.989953
hsa04390	Hippo signaling pathway	4/216	-0.00438531	0.989953
hsa04014	Ras signaling pathway	6/216	-0.00438531	0.989953
hsa01230	Biosynthesis of amino acids	2/216	-0.00438531	0.989953
hsa05160	Hepatitis C	4/216	-0.00438531	0.989953
hsa00980	Metabolism of xenobiotics by cytochrome P450	2/216	-0.00438531	0.989953
hsa05212	Pancreatic cancer	2/216	-0.00438531	0.989953
hsa05020	Prion diseases	1/216	-0.00438531	0.989953
hsa05412	Arrhythmogenic right ventricular cardiomyopathy (ARVC)	2/216	-0.00438531	0.989953
hsa00500	Starch and sucrose metabolism	1/216	-0.00438531	0.989953
hsa04721	Synaptic vesicle cycle	2/216	-0.00438531	0.989953
hsa04510	Focal adhesion	5/216	-0.00438531	0.989953
hsa01521	EGFR tyrosine kinase inhibitor resistance	2/216	-0.00438531	0.989953
hsa00760	Nicotinate and nicotinamide metabolism	1/216	-0.00438531	0.989953
hsa05216	Thyroid cancer	1/216	-0.00438531	0.989953
hsa05169	Epstein-Barr virus infection	5/216	-0.00438531	0.989953
hsa05330	Allograft rejection	1/216	-0.00438531	0.989953
hsa00513	Various types of N-glycan biosynthesis	1/216	-0.00438531	0.989953
hsa04141	Protein processing in endoplasmic reticulum	4/216	-0.00438531	0.989953
hsa04216	Ferroptosis	1/216	-0.00438531	0.989953
hsa05033	Nicotine addiction	1/216	-0.00438531	0.989953
hsa03440	Homologous recombination	1/216	-0.00438531	0.989953
hsa05219	Bladder cancer	1/216	-0.00438531	0.989953
hsa05332	Graft-versus-host disease	1/216	-0.00438531	0.989953
hsa04530	Tight junction	4/216	-0.00438531	0.989953
hsa05165	Human papillomavirus infection	8/216	-0.00438531	0.989953
hsa05210	Colorectal cancer	2/216	-0.00438531	0.989953
hsa00380	Tryptophan metabolism	1/216	-0.00438531	0.989953
hsa04940	Type I diabetes mellitus	1/216	-0.00438531	0.989953
hsa04010	MAPK signaling pathway	7/216	-0.00438531	0.989953
hsa00071	Fatty acid degradation	1/216	-0.00438531	0.989953
hsa05322	Systemic lupus erythematosus	3/216	-0.00438531	0.989953
hsa05410	Hypertrophic cardiomyopathy (HCM)	2/216	-0.00438531	0.989953
hsa03022	Basal transcription factors	1/216	-0.00438531	0.989953
hsa03050	Proteasome	1/216	-0.00438531	0.989953
hsa03015	mRNA surveillance pathway	2/216	-0.00438531	0.989953
hsa04210	Apoptosis	3/216	-0.00438531	0.989953
hsa03420	Nucleotide excision repair	1/216	-0.00438531	0.989953
hsa04657	IL-17 signaling pathway	2/216	-0.00438531	0.989953
hsa00520	Amino sugar and nucleotide sugar metabolism	1/216	-0.00438531	0.989953
hsa05163	Human cytomegalovirus infection	5/216	-0.00438531	0.989953
hsa04550	Signaling pathways regulating pluripotency of stem cells	3/216	-0.00438531	0.989953
hsa05414	Dilated cardiomyopathy (DCM)	2/216	-0.00438531	0.989953
hsa00270	Cysteine and methionine metabolism	1/216	-0.00438531	0.989953
hsa05030	Cocaine addiction	1/216	-0.00438531	0.989953
hsa00510	N-Glycan biosynthesis	1/216	-0.00438531	0.989953
hsa05144	Malaria	1/216	-0.00438531	0.989953
hsa05167	Kaposi sarcoma-associated herpesvirus infection	4/216	-0.00438531	0.989953
hsa05231	Choline metabolism in cancer	2/216	-0.00438531	0.989953
hsa04151	PI3K-Akt signaling pathway	8/216	-0.00438531	0.989953
hsa05014	Amyotrophic lateral sclerosis (ALS)	1/216	-0.00438531	0.989953
hsa04070	Phosphatidylinositol signaling system	2/216	-0.00438531	0.989953
hsa04750	Inflammatory mediator regulation of TRP channels	2/216	-0.00438531	0.989953
hsa04330	Notch signaling pathway	1/216	-0.00438531	0.989953
hsa04961	Endocrine and other factor-regulated calcium reabsorption	1/216	-0.00438531	0.989953
hsa05320	Autoimmune thyroid disease	1/216	-0.00438531	0.989953
hsa05142	Chagas disease (American trypanosomiasis)	2/216	-0.00438531	0.989953
hsa03460	Fanconi anemia pathway	1/216	-0.00438531	0.989953
hsa04923	Regulation of lipolysis in adipocytes	1/216	-0.00438531	0.989953
hsa04928	Parathyroid hormone synthesis, secretion and action	2/216	-0.00438531	0.989953
hsa04978	Mineral absorption	1/216	-0.00438531	0.989953
hsa05213	Endometrial cancer	1/216	-0.00438531	0.989953
hsa04370	VEGF signaling pathway	1/216	-0.00438531	0.989953
hsa04730	Long-term depression	1/216	-0.00438531	0.989953
hsa04060	Cytokine-cytokine receptor interaction	6/216	-0.00438531	0.989953
hsa05161	Hepatitis B	3/216	-0.00438531	0.989953
hsa00590	Arachidonic acid metabolism	1/216	-0.00438531	0.989953
hsa04623	Cytosolic DNA-sensing pathway	1/216	-0.00438531	0.989953
hsa05217	Basal cell carcinoma	1/216	-0.00438531	0.989953
hsa04726	Serotonergic synapse	2/216	-0.00438531	0.989953
hsa04015	Rap1 signaling pathway	4/216	-0.00438531	0.989953
hsa04929	GnRH secretion	1/216	-0.00438531	0.989953
hsa05131	Shigellosis	1/216	-0.00438531	0.989953
hsa05164	Influenza A	3/216	-0.00438531	0.989953
hsa04622	RIG-I-like receptor signaling pathway	1/216	-0.00438531	0.989953
hsa04917	Prolactin signaling pathway	1/216	-0.00438531	0.989953
hsa04918	Thyroid hormone synthesis	1/216	-0.00438531	0.989953
hsa05152	Tuberculosis	3/216	-0.00438531	0.989953
hsa05214	Glioma	1/216	-0.00438531	0.989953
hsa04068	FoxO signaling pathway	2/216	-0.00438531	0.989953
hsa03320	PPAR signaling pathway	1/216	-0.00438531	0.989953
hsa05133	Pertussis	1/216	-0.00438531	0.989953
hsa05220	Chronic myeloid leukemia	1/216	-0.00438531	0.989953
hsa00983	Drug metabolism - other enzymes	1/216	-0.00438531	0.989953
hsa04910	Insulin signaling pathway	2/216	-0.00438531	0.989953
hsa04062	Chemokine signaling pathway	3/216	-0.00438531	0.989953
hsa05162	Measles	2/216	-0.00438531	0.989953
hsa05204	Chemical carcinogenesis	1/216	-0.00438531	0.989953
hsa04080	Neuroactive ligand-receptor interaction	6/216	-0.00438531	0.989953
hsa04911	Insulin secretion	1/216	-0.00438531	0.989953
hsa04512	ECM-receptor interaction	1/216	-0.00438531	0.989953
hsa04211	Longevity regulating pathway	1/216	-0.00438531	0.989953
hsa04261	Adrenergic signaling in cardiomyocytes	2/216	-0.00438531	0.989953
hsa05032	Morphine addiction	1/216	-0.00438531	0.989953
hsa05205	Proteoglycans in cancer	3/216	-0.00438531	0.989953
hsa04658	Th1 and Th2 cell differentiation	1/216	-0.00438531	0.989953
hsa05323	Rheumatoid arthritis	1/216	-0.00438531	0.989953
hsa05206	MicroRNAs in cancer	5/216	-0.00438531	0.989953
hsa04713	Circadian entrainment	1/216	-0.00438531	0.989953
hsa04810	Regulation of actin cytoskeleton	3/216	-0.00438531	0.989953
hsa04925	Aldosterone synthesis and secretion	1/216	-0.00438531	0.989953
hsa04310	Wnt signaling pathway	2/216	-0.00438531	0.989953
hsa04640	Hematopoietic cell lineage	1/216	-0.00438531	0.989953
hsa04933	AGE-RAGE signaling pathway in diabetic complications	1/216	-0.00438531	0.989953
hsa04630	JAK-STAT signaling pathway	2/216	-0.00438531	0.989953
hsa04916	Melanogenesis	1/216	-0.00438531	0.989953
hsa04064	NF-kappa B signaling pathway	1/216	-0.00438531	0.989953
hsa04972	Pancreatic secretion	1/216	-0.00438531	0.989953
hsa04620	Toll-like receptor signaling pathway	1/216	-0.00438531	0.989953
hsa04625	C-type lectin receptor signaling pathway	1/216	-0.00438531	0.989953
hsa04022	cGMP-PKG signaling pathway	2/216	-0.00438531	0.989953
hsa03008	Ribosome biogenesis in eukaryotes	1/216	-0.00438531	0.989953
hsa04668	TNF signaling pathway	1/216	-0.00438531	0.989953
hsa04670	Leukocyte transendothelial migration	1/216	-0.00438531	0.989953
hsa04724	Glutamatergic synapse	1/216	-0.00438531	0.989953
hsa04071	Sphingolipid signaling pathway	1/216	-0.00438531	0.989953
hsa04722	Neurotrophin signaling pathway	1/216	-0.00438531	0.989953
hsa04152	AMPK signaling pathway	1/216	-0.00438531	0.989953
hsa04611	Platelet activation	1/216	-0.00438531	0.989953
hsa04380	Osteoclast differentiation	1/216	-0.00438531	0.989953
hsa04926	Relaxin signaling pathway	1/216	-0.00438531	0.989953
hsa04650	Natural killer cell mediated cytotoxicity	1/216	-0.00438531	0.989953
hsa04728	Dopaminergic synapse	1/216	-0.00438531	0.989953
hsa04270	Vascular smooth muscle contraction	1/216	-0.00438531	0.989953
hsa05130	Pathogenic Escherichia coli infection	2/216	-0.00438531	0.989953
hsa04371	Apelin signaling pathway	1/216	-0.00438531	0.989953
hsa04072	Phospholipase D signaling pathway	1/216	-0.00356028	0.991836
hsa04360	Axon guidance	1/216	-0.00102824	0.997635
hsa04024	cAMP signaling pathway	1/216	-0.00102824	0.997635
